# Supplementary material for: Reactive oxygen species mediated theranostics using a Fenton reaction activable lipo-polymersome
Source: Royal Society of Chemistry journal article supplement (doi:10.1039/c8tb02947d), 2018-12-14
Supplement: c8tb02947d1.pdf [file c8tb02947d1.pdf]

## Reactive Oxygen Species Mediated Theranostic Using a Fenton Reaction Activable Lipo-polymersome

Chaoqun You, et al.

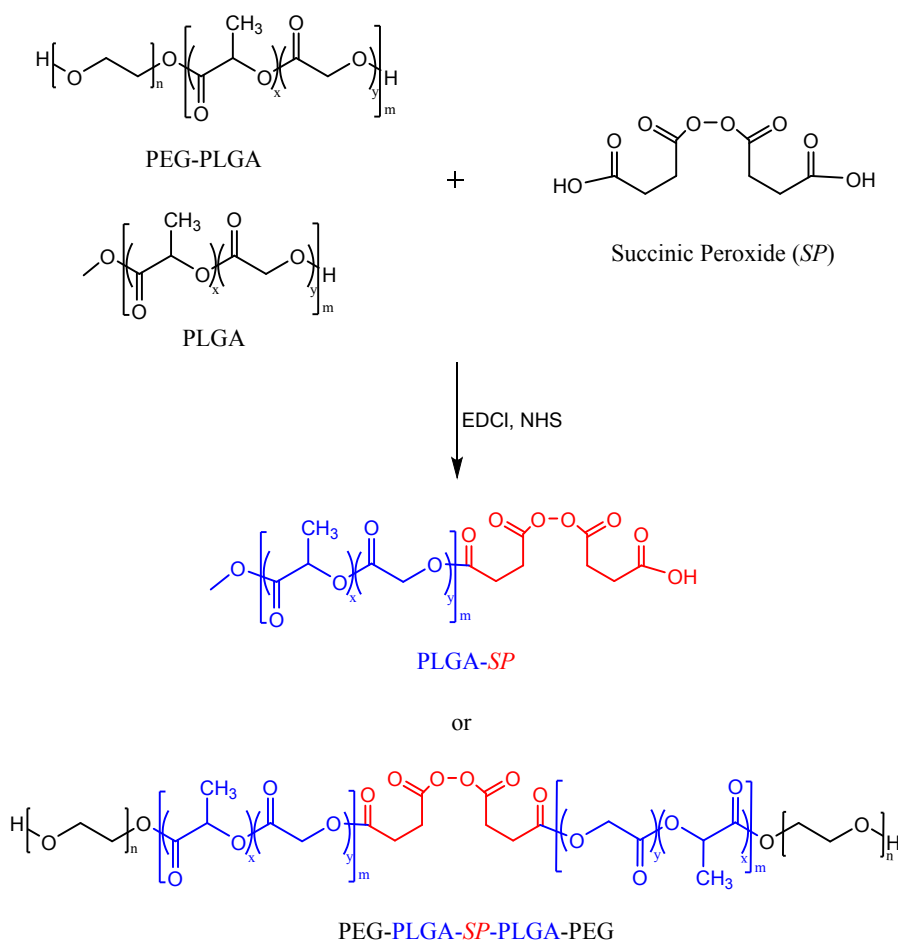

**Fig. S1** the synthesis routes of SP conjugated polymers.

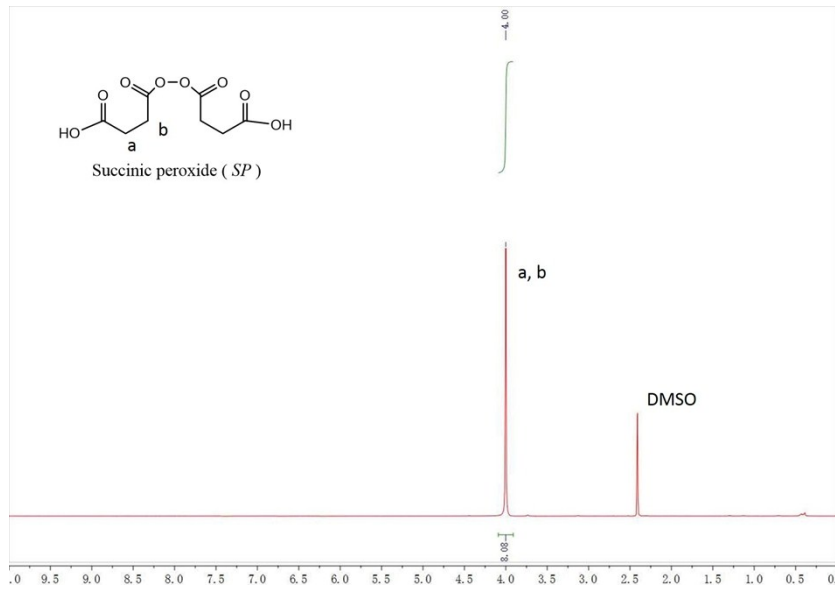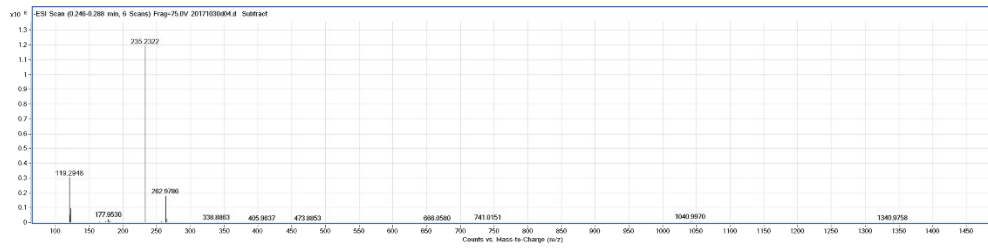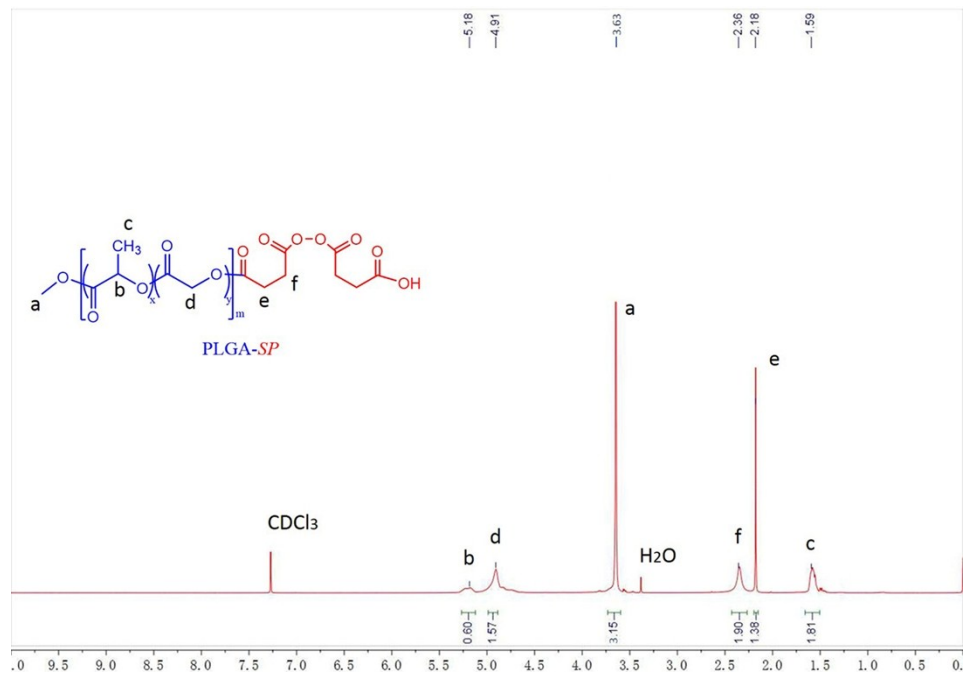

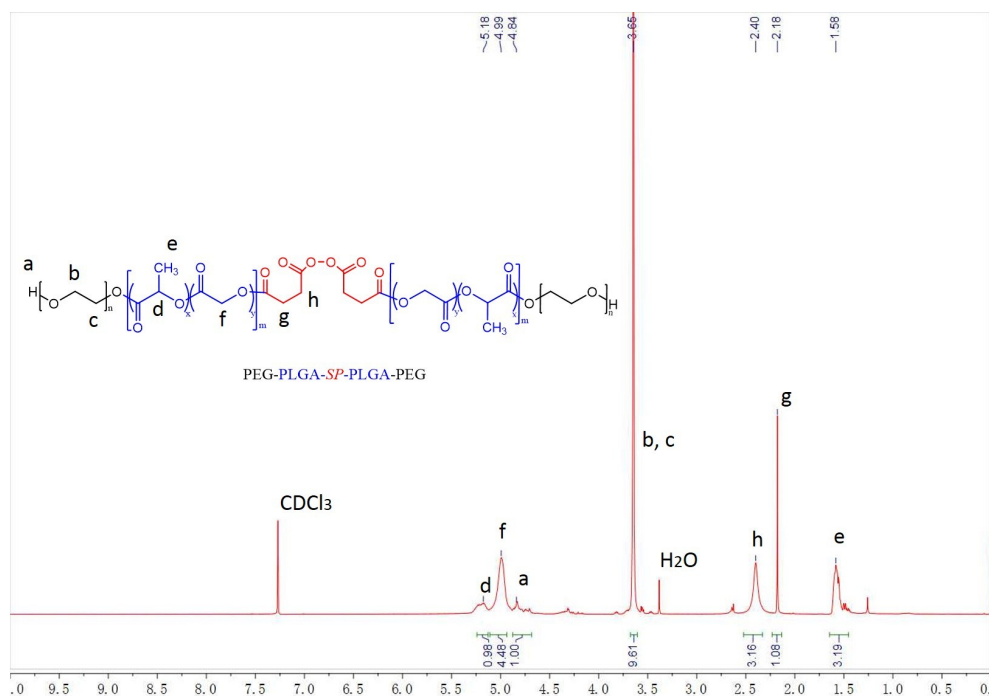

**Fig. S2d**  $^1\text{H}$  NMR spectral analysis of  $(\text{PEG-PLGA})_2\text{-SP}$  conjugated polymer

**Table S1** Detailed information of synthesized SP conjugated polymer

| Polymer                         | Mn (GPC) | Mw (GPC) | Yield (%) |
|---------------------------------|----------|----------|-----------|
| PLGA                            | 1014     | 1085     | N/A       |
| PLGA-SP                         | 1256     | 1310     | 68%       |
| PEG-PLGA                        | 2035     | 2113     | N/A       |
| $(\text{PEG-PLGA})_2\text{-SP}$ | 4306     | 4412     | 76%       |

**Table S2** Particle size, PDI,  $\text{Fe}_3\text{O}_4$ , SP and Pt contents of the lipo-polymerosomes with different ratio of  $(\text{PEG-PLGA})_2\text{-SP}$

| Feed mass (mg)                                                      | Size (nm) | PDI   | DLC (wt%)                        |
|---------------------------------------------------------------------|-----------|-------|----------------------------------|
| $\text{Fe}_3\text{O}_4$ : $(\text{PEG-PLGA})_2\text{-SP}$ : PLGA-SP |           |       | $\text{Fe}_3\text{O}_4$ ; SP; Pt |
| <b>4:1:5</b>                                                        | 93.9      | 0.214 | 3.67; 2.87; 3.94                 |
| <b>4:2:5</b>                                                        | 105.2     | 0.143 | 6.82; 3.16; 4.46                 |
| <b>4:3:5</b>                                                        | 113.6     | 0.226 | 9.81; 3.45; 4.85                 |
| <b>4:4:5</b>                                                        | 131.2     | 0.121 | 9.78; 3.73; 4.93                 |

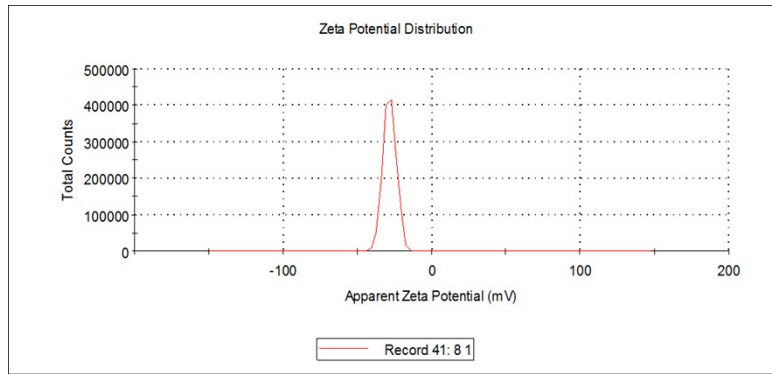

**Fig. S3** the zeta potential of Pt/Fe<sub>3</sub>O<sub>4</sub>@SP-PLGA LPs

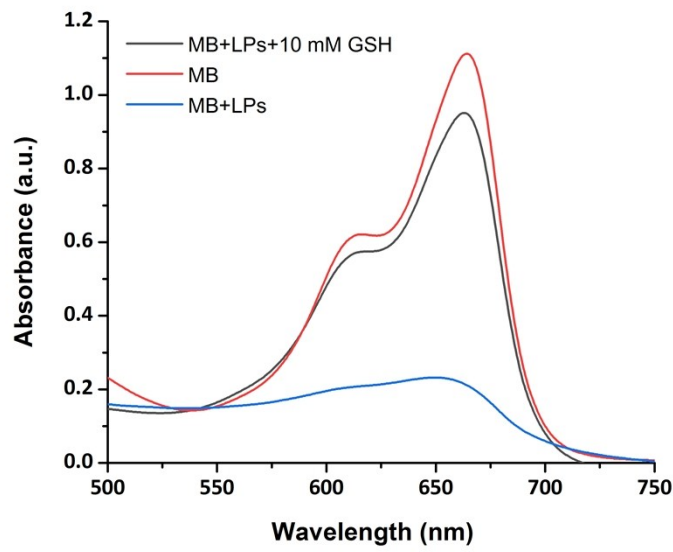

**Fig. S4.** UV/Vis absorption spectra of MB after treatment with LPs solution or 10 mM GSH alone.

Lipo-polymerosomes solution : 100 mM.

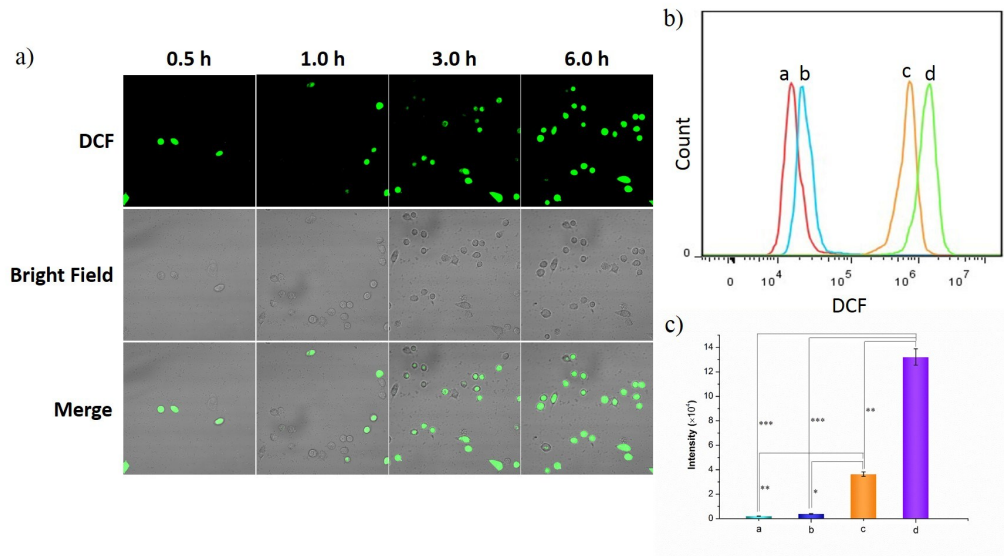

**Fig. S5.** Evaluation the capability of ROS generation of Pt/Fe<sub>3</sub>O<sub>4</sub>@SP-PLGA LPs in vitro. (a) CLSM images of MCF-7 cells incubated with Pt/Fe<sub>3</sub>O<sub>4</sub>@SP-PLGA LPs for different incubation time. Flow cytometric analysis (b) and quantitation (c) of ROS levels in MCF-7 cells. (n = 3). \*: P < 0.05, \*\*: P < 0.01 and \*\*\*: P < 0.001.
